# Supplementary material
Source: PubMed Central journal article supplement (PMC3128322)
Supplement: Supp_Fig.pdf [file Supp_Fig.pdf]

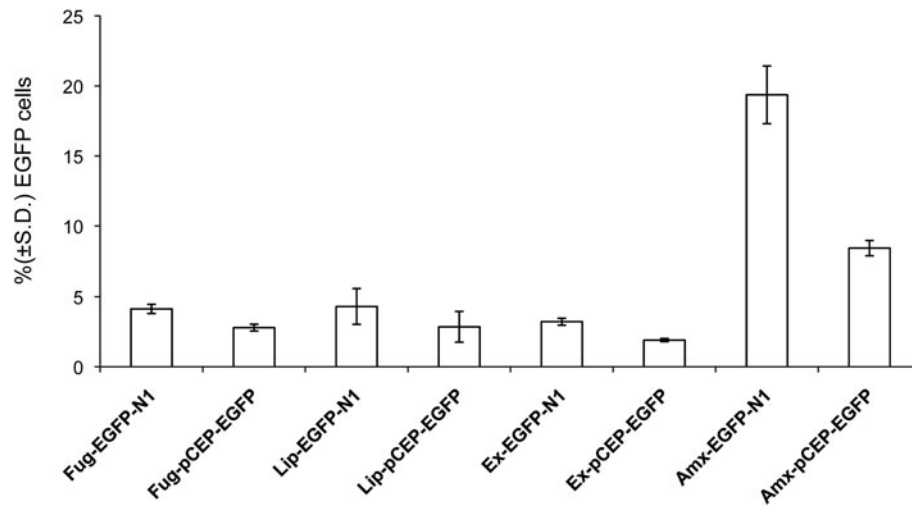

**SUPPLEMENTARY FIG. S1.** Transfection of H9-human embryonic stem cells (hESCs) using several methods. Flow cytometry was used to quantify the percentage  $\pm$  standard deviation (S.D.) ( $n = 3$ , X-axis) of enhanced green fluorescent protein (EGFP)-expressing cells upon transfection with EGFP-N1 (4.4-kb; see Materials and Methods section) or pCEP-EGFP (11-kb; see Materials and Methods section). H9-hESCs were transfected using Fugene (Fug-), Lipofectamine (Lip-), ExGen500 (Ex-), and Nucleofection (Amx-). Nontransfected cells were used as a control group (not shown in the graph). The X-axis indicates the plasmid and transfection method used. See Materials and Methods section for transfection details.
